# Supplementary material for: Targeted multi-epitope switching enables straightforward positive/negative selection of CAR T cells
Source: PubMed Central journal article supplement (PMC8455323; doi:10.1038/s41434-021-00220-6), 2021-02-01
Supplement: 41434_2021_220_MOESM1_ESM.pdf [file 41434_2021_220_MOESM1_ESM.pdf]

## SUPPLEMENTARY DATA

### Targeted multi-epitope switching enables straightforward positive/negative selection of CAR T cells

Laura Mosti<sup>1,2,3</sup>, Lukas M. Langner<sup>1,2,3</sup>, Kay O. Chmielewski<sup>1,2,3</sup>, Patrick Arbuthnot<sup>4</sup>, Jamal Alzubi<sup>1,2,3</sup> and Toni Cathomen<sup>1,2,3,#</sup>

<sup>1</sup> Institute for Transfusion Medicine and Gene Therapy, Medical Center - University of Freiburg, Freiburg, Germany.

<sup>2</sup> Center for Chronic Immunodeficiency (CCI), Medical Center - University of Freiburg, Freiburg, Germany

<sup>3</sup> Faculty of Medicine, University of Freiburg, Freiburg, Germany

<sup>4</sup> Wits/SAMRC Antiviral Gene Therapy Research Unit, School of Pathology, Faculty of Health Sciences, University of the Witwatersrand, Johannesburg, South Africa

# Correspondence: Toni Cathomen, [toni.cathomen@uniklinik-freiburg.de](mailto:toni.cathomen@uniklinik-freiburg.de)

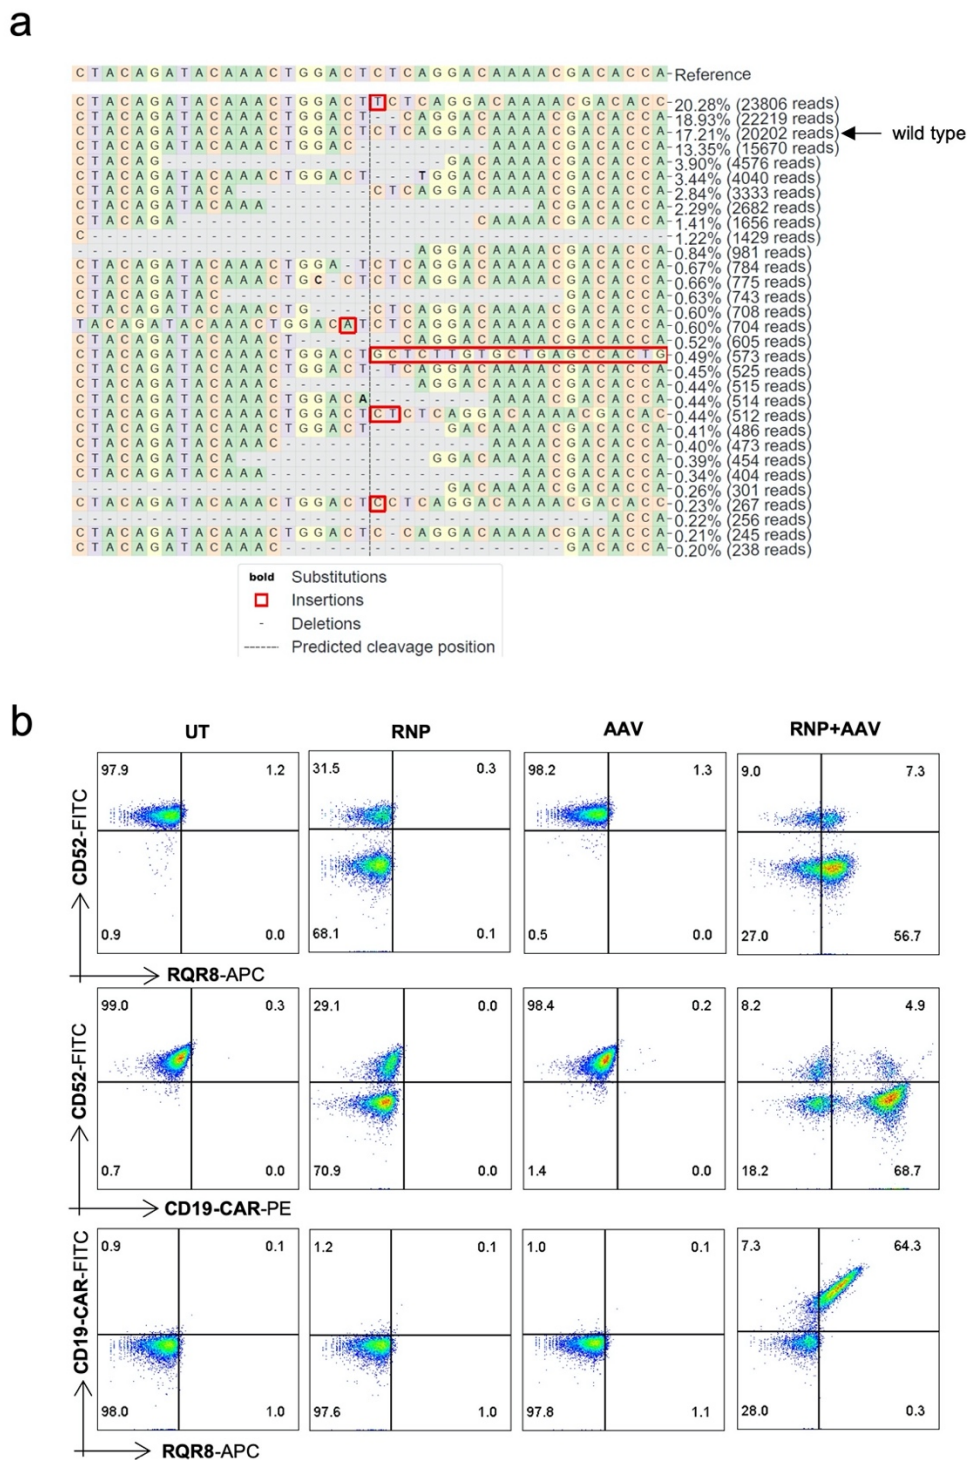

**Figure S1: Profile of esCAR T cells.** **a** Genotypic analysis by NGS. Data were analyzed using CRISPResso2. Exemplarily shown is the analysis of the RNP-electroporated sample. The reference target sequence of *CD52* is indicated on top, followed by the different modified and unmodified sequences ranked according to their number of reads. The arrow pinpoints the wild type sequence. **b** Phenotypic analysis by flow cytometry. Exemplarily shown are double stainings that reveal the expression of CD52, RQR8 and CD19-targeting CAR. UT, untreated T cells; RNP, RNP-electroporated T cells; AAV, AAV-transduced T cells; RNP+AAV, T cells electroporated with RNP-PE and transduced with  $5 \times 10^4$  genome copies/cell.



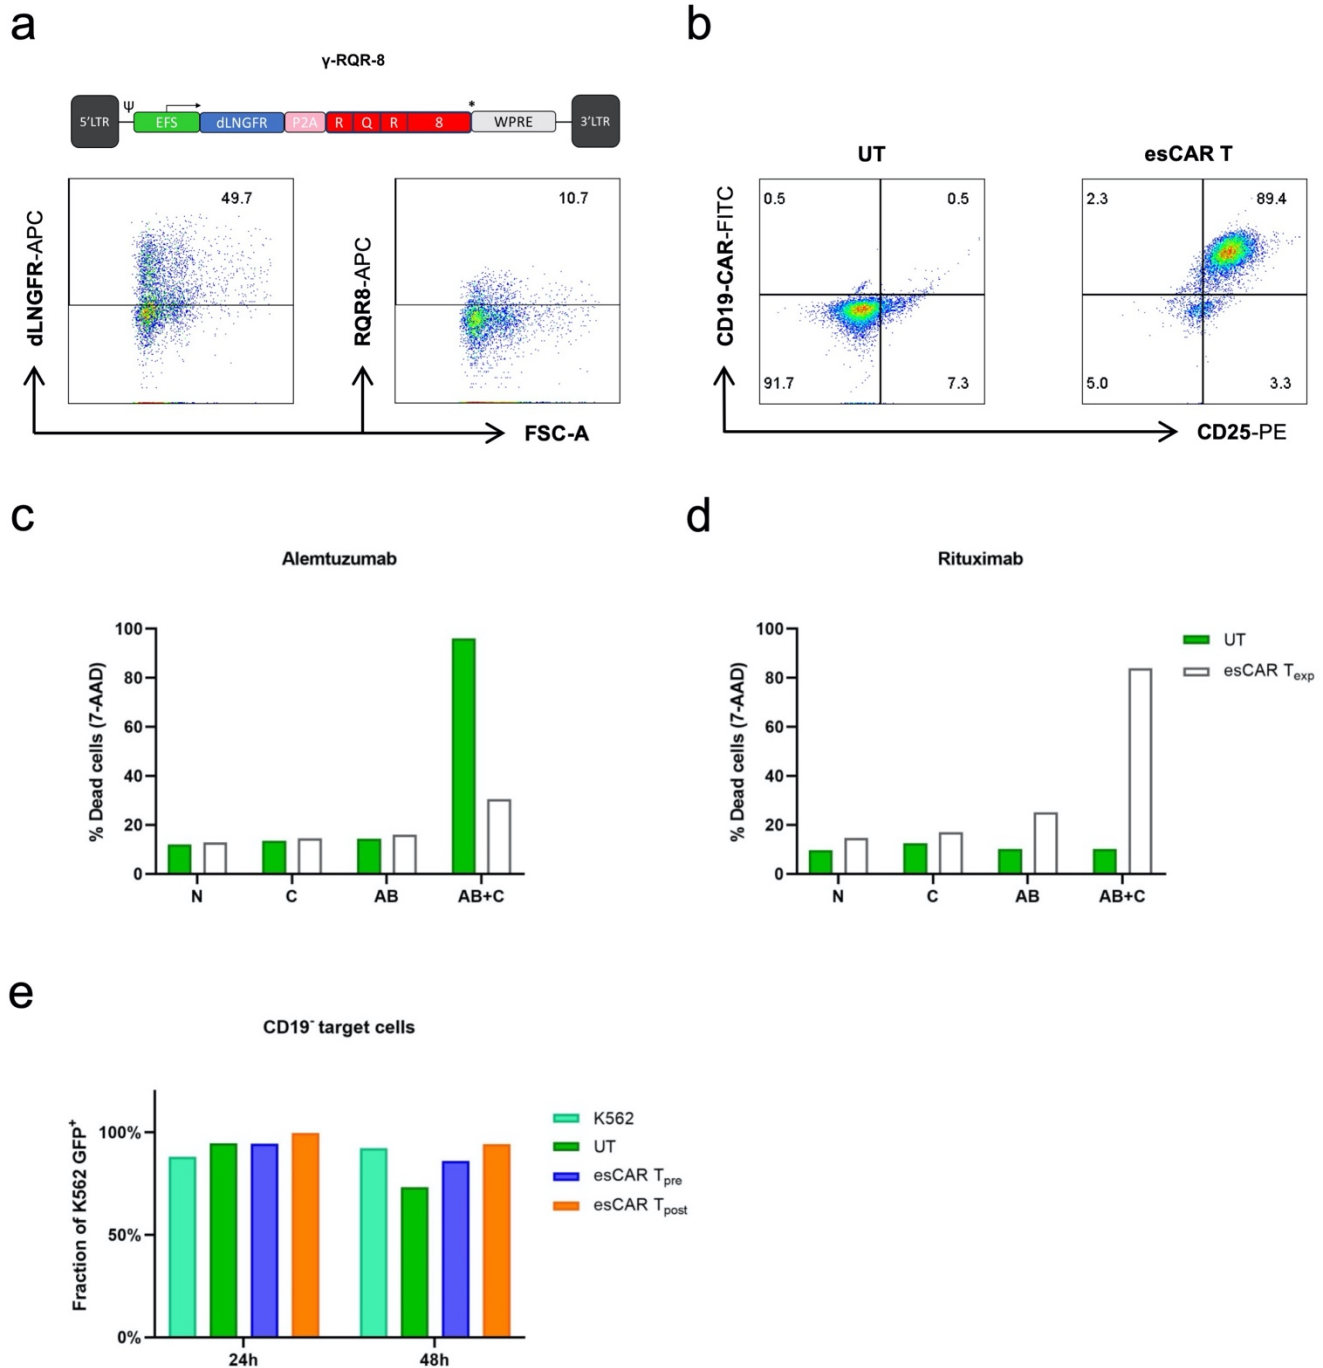

**Figure S3: Activation and expansion of esCAR T cells.** **a** Transgene expression levels in T cells transduced with a gamma-retroviral vector carrying a dLNGFR-P2A-RQR8 cassette. Flow cytometric analysis was performed 5 days post-transduction. **b** Activation of esCAR T cells. Untreated T cells (UT) or esCAR T cells were challenged by co-cultivation with irradiated NALM6 target cells. Expression of CD19-CAR and CD25 was assessed by flow cytometry after 6 days. **c-d** Sensitivity of expanded esCAR T cells to Alemtuzumab or Rituximab. Complement-dependent cytotoxicity assay was performed with media only (N), complement only (C), antibody only (AB), or antibody plus complement (AB+C). UT, untreated T cells; esCAR T<sub>exp</sub>, expanded esCAR T cells. **e** Cytotoxicity assay. Effector esCAR T cells (pre- and post-selected) or untreated T cells (UT) were co-cultured with K562-GFP<sup>+</sup> (CD19<sup>-</sup>) target cells at effector to target (E:T) ratios of 1:1. Percentages of GFP<sup>+</sup> cells are showed at 24h and 48h time points. The fraction of GFP<sup>+</sup> cells was normalized to the target-only sample (K562). The center values reported are the mean of three technical replicates (N=1).
